# Supplementary material for: Waterlogging tolerance and recovery capability screening in peanut: a comparative analysis of waterlogging effects on physiological traits and yield
Source: PeerJ. 2022 Jan 12;10:e12741. doi: 10.7717/peerj.12741 (PMC8760856; doi:10.7717/peerj.12741)
Supplement: Supplemental Information 1 [file peerj-10-12741-s001.xlsx]

## Sheet: Sheet1
品种名	百果重	百粒重	百果重	百粒重	单株总果数	亩产	百果重	百粒重	百果重	百粒重	单株总果数	亩产	RHPW	RHKW	RTP	RY	R1	R2	R3	R4
1	17.13	6.21	171.3	62.1	16	328.896	14.61	5.15	146.1	51.5	14	245.448	14.711	17.0692	12.5	25.3722	0.85289	0.829308	0.875	0.746278
1	16.62	6.39	166.2	63.9	15	330.048	14.4	5.34	144	53.4	12	207.36	13.3574	16.4319	20	37.1728	0.866426	0.835681	0.8	0.628272
1	17.19	6.52	171.9	65.2	16	330.048	14.7	5.47	147	54.7	14	246.96	14.4852	16.1043	12.5	25.1745	0.855148	0.838957	0.875	0.748255
	16.98	6.37333	169.8	63.7333	15.6667	319.224	14.57	5.32	145.7	53.2	13.3333	233.256	14.1845	16.5352	15	29.2398	0.858155	0.834648	0.85	0.707602
	0.180831	0.0898765	1.80831	0.898765	0.333333	0.384	0.0888819	0.0929157	0.888819	0.929157	0.666667	12.9554	0.418675	0.283298	2.5	3.96689	0.00418675	0.00283298	0.025	0.0396689
3	18.01	5.94	180.1	59.4	19	410.628	17.8	5.3	178	53	19	398.4	1.16602	10.7744	0	2.97788	0.98834	0.892256	1	0.970221
3	17.63	6.03	176.3	60.3	20	423.12	16.6	5.4	166	54	20	405.84	5.84231	10.4478	0	4.08395	0.941577	0.895522	1	0.959161
3	17.83	5.44	178.3	54.4	20	427.92	16.8	5.2	168	52	21	423.36	5.77678	4.41176	-5	1.06562	0.942232	0.955882	1.05	0.989344
	17.8233	5.80333	178.233	58.0333	19.6667	420.631	17.0667	5.3	170.667	53	20	409.2	4.2617	8.54465	-1.66667	2.70915	0.957383	0.914554	1.01667	0.972909
	0.109747	0.183515	1.09747	1.83515	0.333333	5.15377	0.371184	0.057735	3.71184	0.57735	0.57735	7.39859	1.54796	2.06859	1.66667	0.881616	0.0154796	0.0206859	0.0166667	0.00881616
4	18.2	6.4	182	64	28	611.52	14.49	5.25	144.9	52.5	17	295.596	20.3846	17.9688	39.2857	51.6621	0.796154	0.820312	0.607143	0.483379
4	18.8	6.3	188	63	26	586.56	14.34	5.18	143.4	51.8	17	292.536	23.7234	17.7778	34.6154	50.1268	0.762766	0.822222	0.653846	0.498732
4	18.6	6.1	186	61	26	580.32	14.03	5.06	140.3	50.6	18	303.048	24.5699	17.0492	30.7692	47.7792	0.754301	0.829508	0.692308	0.522208
	18.5333	6.26667	185.333	62.6667	26.6667	593.067	14.2867	5.16333	142.867	51.6333	17.3333	297.06	22.8926	17.5986	34.8901	49.856	0.771074	0.824014	0.651099	0.50144
	0.176383	0.0881917	1.76383	0.881917	0.666667	9.53176	0.135442	0.0554777	1.35442	0.554777	0.333333	3.12159	1.2776	0.280172	2.46233	1.12905	0.012776	0.00280172	0.0246233	0.0112905
10	17.25	6.08	172.5	60.8	30	621	10.02	4.32	100.2	43.2	10	120.24	41.913	28.9474	66.6667	80.6377	0.58087	0.710526	0.333333	0.193623
10	17.31	5.81	173.1	58.1	25	519.3	10.11	4.09	101.1	40.9	9	109.188	41.5945	29.6041	64	78.974	0.584055	0.703959	0.36	0.21026
10	17.92	6.11	179.2	61.1	26	559.104	10.9	4.2	109	42	10	130.8	39.1741	31.2602	61.5385	76.6054	0.608259	0.687398	0.384615	0.233946
	17.4933	6	174.933	60	27	566.784	10.3433	4.20333	103.433	42.0333	9.66667	120.076	40.8939	29.9372	64.0684	78.739	0.591061	0.700628	0.359316	0.21261
	0.214035	0.0953939	2.14035	0.953939	1.52753	29.5883	0.279543	0.0664162	2.79543	0.664162	0.333333	6.23939	0.864785	0.688126	1.48078	1.16993	0.00864785	0.00688126	0.0148078	0.0116993
23	17	6.25	170	62.5	20	408	13.34	4.62	133.4	46.2	11	176.088	21.5294	26.08	45	56.8412	0.784706	0.7392	0.55	0.431588
23	16.74	6.35	167.4	63.5	21	421.848	13.27	4.51	132.7	45.1	11	175.164	20.7288	28.9764	47.619	58.477	0.792712	0.710236	0.52381	0.41523
23	17.02	6.2	170.2	62	20	408.48	13.15	4.7	131.5	47	12	189.36	22.738	24.1935	40	53.6428	0.77262	0.758065	0.6	0.463572
	16.92	6.26667	169.2	62.6667	20.3333	412.848	13.2533	4.61	132.533	46.1	11.3333	180.204	21.6654	26.4166	44.2063	56.3203	0.783346	0.735834	0.557937	0.436797
	0.090185	0.0440959	0.90185	0.440959	0.333333	4.53812	0.0554777	0.0550757	0.554777	0.550757	0.333333	4.58576	0.583966	1.39091	2.23494	1.41961	0.00583966	0.0139091	0.0223494	0.0141961
29	19.58	5.08	195.8	50.8	26	610.896	16.44	4.08	164.4	40.8	13	256.464	16.0368	19.685	50	58.0184	0.839632	0.80315	0.5	0.419816
29	19.57	5.25	195.7	52.5	27	634.068	16.7	4.18	167	41.8	11	220.44	14.6653	20.381	59.2593	65.234	0.853347	0.79619	0.407407	0.34766
29	19.33	5.15	193.3	51.5	25	579.9	16.06	4.13	160.6	41.3	11	211.992	16.9167	19.8058	56	63.4434	0.830833	0.801942	0.44	0.365566
	19.4933	5.16	194.933	51.6	26	608.192	16.4	4.13	164	41.3	11.6667	229.632	15.8729	19.9573	55.0864	62.2319	0.841271	0.800427	0.449136	0.377681
	0.0817177	0.0493288	0.817177	0.493288	0.57735	15.6912	0.185831	0.0288675	1.85831	0.288675	0.666667	13.6359	0.655068	0.21469	2.71167	2.16925	0.00655068	0.0021469	0.0271167	0.0216925
36	17	5	170	50	18	367.2	11.44	4.06	114.4	40.6	12	164.736	32.7059	18.8	33.3333	55.1373	0.672941	0.812	0.666667	0.448627
36	18	5.2	180	52	17	367.2	11.7	4.1	117	41	11	154.44	35	21.1538	35.2941	57.9412	0.65	0.788462	0.647059	0.420588
36	18	5.3	180	53	19	410.4	11.38	4.2	113.8	42	13	177.528	36.7778	20.7547	31.5789	56.7427	0.632222	0.792453	0.684211	0.432573
	17.6667	5.16667	176.667	51.6667	18	381.6	11.5067	4.12	115.067	41.2	12	165.568	34.8279	20.2362	33.4021	56.607	0.651721	0.797638	0.665979	0.43393
	0.333333	0.0881917	3.33333	0.881917	0.57735	14.4	0.0982061	0.0416333	0.982061	0.416333	0.57735	6.6779	1.1786	0.727279	1.07303	0.812259	0.011786	0.00727279	0.0107303	0.00812259
37	16.2	7.12	162	71.2	20	388.8	15.5	6.18	155	61.8	10	186	4.32099	13.2022	50	52.1605	0.95679	0.867978	0.5	0.478395
37	16.55	7.06	165.5	70.6	20	397.2	15.61	6.12	156.1	61.2	9	168.588	5.67976	13.3144	55	57.5559	0.943202	0.866856	0.45	0.424441
37	16.62	6.89	166.2	68.9	16	319.104	15.77	6.08	157.7	60.8	8	151.392	5.11432	11.7562	50	52.5572	0.948857	0.882438	0.5	0.474428
	16.4567	7.02333	164.567	70.2333	18.6667	368.629	15.6267	6.12667	156.267	61.2667	9	168.66	5.03836	12.7576	51.6667	54.0912	0.949616	0.872424	0.483333	0.459088
	0.129915	0.0688799	1.29915	0.688799	1.33333	24.7511	0.0783865	0.0290593	0.783865	0.290593	0.57735	9.99053	0.394078	0.501773	1.66667	1.73614	0.00394078	0.00501773	0.0166667	0.0173614
39	18.27	6.9	182.7	69	16	350.784	10	3.6	100	36	12	144	45.2655	47.8261	25	58.9491	0.547345	0.521739	0.75	0.410509
39	17.71	7.11	177.1	71.1	16	340.032	10.4	3.4	104	34	13	162.24	41.2761	52.18	18.75	52.2868	0.587239	0.4782	0.8125	0.477132
39	18.56	7.02	185.6	70.2	17	378.624	9.8	3.3	98	33	13	152.88	47.1983	52.9915	23.5294	59.6222	0.528017	0.470085	0.764706	0.403778
	18.18	7.01	181.8	70.1	16.3333	356.328	10.0667	3.43333	100.667	34.3333	12.6667	153.04	44.58	50.9992	22.4265	56.9527	0.5542	0.490008	0.775735	0.430473
	0.249466	0.0608276	2.49466	0.608276	0.333333	11.4988	0.176383	0.0881917	1.76383	0.881917	0.333333	5.26604	1.7436	1.60375	1.88662	2.34101	0.017436	0.0160375	0.0188662	0.0234101
51	17.57	7.4	175.7	74	22	463.848	10.6	3.9	106	39	13	165.36	39.6699	47.2973	40.9091	64.3504	0.603301	0.527027	0.590909	0.356496
51	18.27	7.14	182.7	71.4	23	504.252	11.8	4	118	40	14	198.24	35.4132	43.9776	39.1304	60.6863	0.645868	0.560224	0.608696	0.393137
51	18.24	7.09	182.4	70.9	27	590.976	11	3.7	110	37	17	224.4	39.693	47.8138	37.037	62.0289	0.60307	0.521862	0.62963	0.379711
	18.0267	7.21	180.267	72.1	24	519.168	11.1333	3.86667	111.333	38.6667	14.6667	196	38.2587	46.3629	39.0255	62.3552	0.617413	0.536371	0.609745	0.376448
	0.228498	0.0960902	2.28498	0.960902	1.52753	37.5019	0.352767	0.0881917	3.52767	0.881917	1.20185	17.0801	1.42275	1.20194	1.119	1.07023	0.0142275	0.0120194	0.01119	0.0107023
52	18.68	6.91	186.8	69.1	23	515.568	18.2	5.5	182	55	12	262.08	2.56959	20.4052	47.8261	49.1667	0.974304	0.795948	0.521739	0.508333
52	18.24	6.75	182.4	67.5	23	503.424	18	5.4	180	54	12	259.2	1.31579	20	47.8261	48.5126	0.986842	0.8	0.521739	0.514874
52	19	7.04	190	70.4	21	478.8	18.4	5.6	184	56	11	242.88	3.15789	20.4545	47.619	49.2732	0.968421	0.795455	0.52381	0.507268
	18.64	6.9	186.4	69	22.3333	499.552	18.2	5.5	182	55	11.6667	254.72	2.34776	20.2866	47.7571	48.9842	0.976522	0.797134	0.522429	0.510158
	0.220303	0.083865	2.20303	0.83865	0.666667	10.8159	0.11547	0.057735	1.1547	0.57735	0.333333	5.97809	0.543214	0.143999	0.0690131	0.237786	0.00543214	0.00143999	0.000690131	0.00237786
55	9.8	3.7	98	37	34	399.84	9.67	3.95	96.7	39.5	15	174.06	1.32653	-6.75676	55.8824	56.4676	0.986735	1.06757	0.441176	0.435324
55	10	3.6	100	36	28	336	9.83	3.8	98.3	38	11	129.756	1.7	-5.55556	60.7143	61.3821	0.983	1.05556	0.392857	0.386179
55	9.6	3.7	96	37	27	311.04	9.45	3.94	94.5	39.4	10	113.4	1.5625	-6.48649	62.963	63.5417	0.984375	1.06486	0.37037	0.364583
	9.8	3.66667	98	36.6667	29.6667	348.88	9.65	3.89667	96.5	38.9667	12	139.072	1.52968	-6.26627	59.8532	60.4638	0.984703	1.06266	0.401468	0.395362
	0.11547	0.0333333	1.1547	0.333333	2.18581	26.4407	0.110151	0.0484195	1.10151	0.484195	1.52753	18.12	0.109053	0.363819	2.08885	2.0931	0.00109053	0.00363819	0.0208885	0.020931
58	19.21	7.48	192.1	74.8	19	437.988	13.97	5.73	139.7	57.3	13	217.932	27.2775	23.3957	31.5789	50.2425	0.727225	0.766043	0.684211	0.497575
58	19.81	7.83	198.1	78.3	20	475.44	13.44	5.88	134.4	58.8	14	225.792	32.1555	24.9042	30	52.5088	0.678445	0.750958	0.7	0.474912
58	19.99	7.93	199.9	79.3	18	431.784	13.68	5.9	136.8	59	13	234.696	31.5658	25.599	27.7778	45.645	0.684342	0.74401	0.722222	0.54355
	19.67	7.74667	196.7	77.4667	19	448.476	13.6967	5.83667	136.967	58.3667	13.3333	226.14	30.3329	24.633	29.7856	49.4655	0.696671	0.75367	0.702144	0.505345
	0.235797	0.136423	2.35797	1.36423	0.57735	13.6361	0.153225	0.0536449	1.53225	0.536449	0.333333	4.84248	1.53718	0.650327	1.10253	2.01914	0.0153718	0.00650327	0.0110253	0.0201914
61	13.4	5.36	134	53.6	24	385.92	10.63	4.76	106.3	47.6	10	127.56	20.6716	11.194	58.3333	66.9465	0.793284	0.88806	0.416667	0.330535
61	13.83	5.82	138.3	58.2	24	398.304	10.42	4.87	104.2	48.7	9	112.536	24.6565	16.323	62.5	71.7462	0.753435	0.83677	0.375	0.282538
61	13.78	5.6	137.8	56	21	347.256	10.29	4.77	102.9	47.7	8	98.784	25.3266	14.8214	61.9048	71.553	0.746734	0.851786	0.380952	0.28447
	13.67	5.59333	136.7	55.9333	23	377.292	10.4467	4.8	104.467	48	9	112.96	23.5516	14.1128	60.9127	70.0819	0.764484	0.858872	0.390873	0.299181
	0.135769	0.132832	1.35769	1.32832	1	15.3734	0.0990511	0.0351188	0.990511	0.351188	0.57735	8.30962	1.4529	1.52241	1.30108	1.56868	0.014529	0.0152241	0.0130108	0.0156868
64	23.15	8.7	231.5	87	19	527.82	13.16	4.44	131.6	44.4	20	315.84	43.1533	48.9655	-5.26316	40.1614	0.568467	0.510345	1.05263	0.598386
64	22.85	8.67	228.5	86.7	18	493.56	13.28	4.5	132.8	45	18	286.848	41.8818	48.0969	0	41.8818	0.581182	0.519031	1	0.581182
64	22.44	8.28	224.4	82.8	19	511.632	13.38	4.38	133.8	43.8	20	321.12	40.3743	47.1014	-5.26316	37.2361	0.596257	0.528986	1.05263	0.627639
	22.8133	8.55	228.133	85.5	18.6667	511.019	13.2733	4.44	132.733	44.4	19.3333	307.936	41.8032	48.0546	-3.50877	39.7598	0.581968	0.519454	1.03509	0.602402
	0.205778	0.135277	2.05778	1.35277	0.333333	9.89499	0.0635959	0.034641	0.635959	0.34641	0.666667	10.6536	0.803197	0.538525	1.75439	1.35605	0.00803197	0.00538525	0.0175439	0.0135605

## Sheet: Waterlogging for 7 days
	REL(%)			MDA(umol/g FW)			SOD(U/g FW)			CAT(U/g FW)			ΦPSⅡ			Fv/Fm			NPQt			qL			SPAD
Varieties	CK	WK		CK	WK		CK	WK		CK	WK		CK	WK		CK	WK		CK	WK		CK	WK		CK	WK
YYHS	71.9269	59.0254	0.820631	7.2199	6.1697	0.854541	5.50649	8.77108	1.59286	74.5455	69.8182	0.936585	0.68	0.678	0.997059	0.8	0.788	0.985	0.218	0.315	1.44495	0.529	0.509	0.962193	45.28	41.02	0.905919
YYHS	70.56	54.5238	0.77273	7.307	6.5685	0.898933	5.92208	10.506	1.77404	74.1818	66.1818	0.892157	0.698	0.68	0.974212	0.808	0.792	0.980198	0.162	0.282	1.74074	0.55	0.557	1.01273	45.5	41.34	0.908571
YYHS	71.1076	54.0711	0.760413	6.9254	6.2989	0.909536	4.67532	8.48193	1.81419	69.8182	67.2727	0.963542	0.701	0.705	1.00571	0.809	0.805	0.995056	0.151	0.282	1.86755	0.554	0.643	1.16065	47.56	41.34	0.869218
YY13	43.7129	79.3213	1.8146	3.917	6.6944	1.70906	13.0108	13.012	1.0001	60	100.364	1.67273	0.631	0.705	1.11727	0.793	0.793	1	0.276	0.249	0.902174	0.448	0.613	1.3683	43.57	43.4	0.996098
YY13	42.6923	76.3675	1.78879	3.9282	6.6664	1.69706	9.26209	8.6747	0.936581	58.9091	89.4545	1.51852	0.639	0.715	1.11894	0.796	0.796	1	0.254	0.193	0.759843	0.454	0.613	1.35022	43.27	42.49	0.981974
YY13	41.5962	75.6904	1.81964	4.0404	6.5233	1.61452	9.26209	8.6747	0.936581	61.0909	110.909	1.81548	0.656	0.701	1.0686	0.799	0.804	1.00626	0.23	0.276	1.2	0.48	0.614	1.27917	44.09	43.4	0.98435
HH2	57.1048	75.7589	1.32666	6.2037	7.0038	1.12897	9.25301	13.1445	1.42056	45.4545	66.5455	1.464	0.666	0.673	1.01051	0.805	0.783	0.972671	0.185	0.352	1.9027	0.483	0.569	1.17805	42.43	39.57	0.932595
HH2	55.2551	72.8992	1.31932	6.4702	7.7079	1.19129	9.25301	13.8244	1.49404	42.5455	65.0909	1.52991	0.68	0.686	1.00882	0.805	0.784	0.973913	0.179	0.346	1.93296	0.514	0.603	1.17315	46.68	41.49	0.888817
HH2	55.5329	73	1.31454	6.4955	7.318	1.12663	10.8916	15.4108	1.41493	45.4545	76.3636	1.68	0.679	0.648	0.954345	0.803	0.778	0.968867	0.195	0.395	2.02564	0.519	0.526	1.01349	43.75	40.97	0.936457
KN1715	88.1356	89.5349	1.01588	6.1875	6.5772	1.06298	5.89235	10.2151	1.73361	81.8182	80.7273	0.986667	0.681	0.656	0.963289	0.803	0.802	0.998755	0.199	0.285	1.43216	0.525	0.503	0.958095	49.46	47.98	0.970077
KN1715	84.5238	88.4328	1.04625	6.3839	6.6307	1.03866	6.23229	10.3896	1.66706	78.5455	77.4545	0.986111	0.699	0.686	0.981402	0.805	0.806	1.00124	0.179	0.206	1.15084	0.562	0.54	0.960854	50.01	48.41	0.968006
KN1715	86.2903	91.1538	1.05636	6.2576	6.3696	1.0179	5.77904	10.5974	1.83377	83.2727	79.2727	0.951965	0.712	0.67	0.941011	0.797	0.795	0.997491	0.243	0.257	1.05761	0.631	0.524	0.830428	49.46	48.29	0.976345
HY4	67.3416	70.0985	1.04094	4.7175	5.8669	1.24365	4.64589	10.9091	2.34812	88	79.2727	0.900826	0.479	0.66	1.37787	0.799	0.796	0.996245	0.767	0.254	0.33116	0.301	0.499	1.65781	41.77	44.67	1.06943
HY4	62.8708	67.8774	1.07963	4.8662	6.2933	1.29327	4.53258	10.0779	2.22344	74.5455	74.5455	1	0.461	0.636	1.37961	0.797	0.794	0.996236	0.77	0.321	0.416883	0.472	0.472	1	41.77	41.38	0.990663
HY4	62.7358	71.2871	1.13631	4.782	5.9706	1.24856	3.55556	7.8961	2.22078	81.4545	78.5455	0.964286	0.65	0.656	1.00923	0.786	0.787	1.00127	0.747	0.267	0.35743	0.725	0.495	0.682759	42.38	44.67	1.05403
DBW	73.5685	81.7204	1.11081	6.4258	3.5696	0.555511	6.00567	3.39943	0.566038	17.8182	12.7273	0.714286	0.654	0.631	0.964832	0.792	0.759	0.958333	0.279	0.553	1.98208	0.496	0.545	1.09879	44.72	36.22	0.809928
DBW	73.6992	80.3231	1.08988	6.6282	3.6482	0.550406	5.43909	3.05949	0.5625	17.4545	11.6364	0.666667	0.659	0.642	0.974203	0.797	0.773	0.969887	0.244	0.529	2.16803	0.492	0.563	1.14431	46.54	36.22	0.778255
DBW	74.7347	80.2639	1.07398	6.3024	3.6706	0.582413	6.34561	3.39943	0.535714	17.4545	11.6364	0.666667	0.657	0.671	1.02131	0.796	0.783	0.983668	0.253	0.354	1.39921	0.491	0.567	1.15479	50.66	39.13	0.772404
YH65	84.6872	91.75	1.0834	4.1538	6.0502	1.45655	7.47967	11.8442	1.58351	1.45455	2.54545	1.75	0.657	0.669	1.01826	0.798	0.777	0.973684	0.201	0.4	1.99005	0.472	0.579	1.22669	46.26	51.3	1.10895
YH65	80.2283	89.2381	1.1123	4.5408	6.14	1.35218	6.61247	11.5325	1.74405	1.45455	2.90909	2	0.652	0.695	1.06595	0.79	0.782	0.989873	0.232	0.236	1.01724	0.473	0.576	1.21776	42.92	46.51	1.08364
YH65	80.9721	88.9151	1.0981	4.3473	6.0782	1.39816	6.50407	11.1169	1.70922	1.09091	2.18182	2	0.647	0.646	0.998454	0.785	0.777	0.989809	0.297	0.359	1.20875	0.488	0.508	1.04098	47.93	57.06	1.19049
YH22	39.6186	68.4071	1.72664	4.8297	7.1822	1.48709	4.19263	12.6667	3.02117	37.4545	45.8182	1.2233	0.668	0.676	1.01198	0.813	0.784	0.96433	0.125	0.344	2.752	0.465	0.574	1.23441	44.16	42.03	0.951766
YH22	40.2399	68.8312	1.71052	4.8606	7.1376	1.46846	4.64589	15.4444	3.32432	38.1818	48.7273	1.27619	0.664	0.683	1.02861	0.812	0.787	0.969212	0.131	0.319	2.43511	0.458	0.584	1.27511	46.16	42.68	0.92461
YH22	40.2477	69.1379	1.71781	4.7231	6.8371	1.44759	5.09915	15.4444	3.02883	37.8182	46.5455	1.23077	0.663	0.649	0.978884	0.815	0.782	0.959509	0.107	0.359	3.35514	0.446	0.515	1.15471	49.12	44.12	0.898208
JH7	89.8817	51.6981	0.57518	4.9473	6.0444	1.22176	7.13253	9.11111	1.2774	50.9091	45.4545	0.892857	0.653	0.666	1.01991	0.823	0.801	0.973269	0.174	0.214	1.22989	0.453	0.495	1.09272	48.01	52.46	1.09269
JH7	87.688	52.6493	0.600416	5.0315	6.2043	1.23309	7.13253	8.22222	1.15278	49.8182	42.1818	0.846715	0.638	0.671	1.05172	0.806	0.789	0.978908	0.232	0.303	1.30603	0.445	0.545	1.22472	49.48	53.77	1.0867
JH7	89.4268	51.8978	0.580338	4.9276	6.0023	1.2181	7.13253	9.22222	1.29298	52.7273	49.4545	0.937931	0.657	0.674	1.02588	0.81	0.796	0.982716	0.192	0.248	1.29167	0.468	0.528	1.12821	49.97	55.11	1.10286
HY10	87.9333	86.722	0.986224	7.5565	6.6695	0.882618	10.4935	11.0753	1.05544	8.72727	21.0909	2.41667	0.658	0.67	1.01824	0.801	0.794	0.991261	0.212	0.265	1.25	0.478	0.525	1.09833	44.43	39.25	0.883412
HY10	82.9545	85.259	1.02778	7.4611	6.4001	0.857796	13.6104	14.8387	1.09025	8.36364	20.3636	2.43478	0.673	0.643	0.955423	0.804	0.791	0.983831	0.193	0.292	1.51295	0.503	0.477	0.94831	45.64	40.96	0.897458
HY10	82.9167	82.197	0.99132	7.2535	6.3101	0.869939	11.1169	12.8084	1.15216	8	20.3636	2.54545	0.64	0.66	1.03125	0.797	0.779	0.977415	0.246	0.386	1.56911	0.454	0.551	1.21366	45.91	41.08	0.894794
FH1	56.7762	54.5106	0.960097	4.6868	9.2839	1.98086	5.35433	5.49398	1.02608	9.09091	72	7.92	0.657	0.654	0.995434	0.8	0.758	0.9475	0.22	0.556	2.52727	0.48	0.602	1.25417	47.82	43.14	0.902133
FH1	57.9612	55.0826	0.950337	4.6812	8.9137	1.90415	6.61417	6.45783	0.976363	8	68.7273	8.59091	0.646	0.662	1.02477	0.807	0.779	0.965304	0.217	0.381	1.75576	0.456	0.554	1.21491	47.59	43.83	0.920992
FH1	60.05	54.6939	0.910806	4.6671	9.2165	1.97478	6.61417	6.45783	0.976363	8	65.0909	8.13636	0.67	0.686	1.02388	0.805	0.777	0.965217	0.168	0.397	2.3631	0.486	0.626	1.28807	47.3	43.14	0.912051
SLLK	39.0075	75.5882	1.93779	4.0688	4.6808	1.15041	10.2169	10.2169	1	45.8182	85.4545	1.86508	0.681	0.665	0.976505	0.796	0.763	0.958543	0.25	0.372	1.488	0.546	0.559	1.02381	44.83	31.13	0.694401
SLLK	37.4633	75.3275	2.0107	4.0296	4.7762	1.18528	12.241	11.2903	0.922339	46.1818	85.0909	1.84252	0.688	0.647	0.940407	0.802	0.774	0.965087	0.208	0.512	2.46154	0.546	0.569	1.04212	45.63	31.13	0.682227
SLLK	37.5	74.728	1.99275	4.0352	4.8295	1.19684	11.4905	11.0753	0.963862	45.0909	84.7273	1.87903	0.679	0.667	0.982327	0.799	0.743	0.929912	0.231	0.422	1.82684	0.533	0.583	1.09381	46.2	33.72	0.72987
JH16	78.1429	88	1.12614	6.4532	5.6856	0.881051	6.61247	11.3978	1.72369	64.3636	114.909	1.78531	0.676	0.671	0.992604	0.799	0.793	0.992491	0.225	0.274	1.21778	0.524	0.533	1.01718	45.1	43.25	0.95898
JH16	75.9817	85.7692	1.12881	6.5486	5.7866	0.883639	6.98925	11.9481	1.70949	61.8182	109.091	1.76471	0.671	0.663	0.988077	0.8	0.8	1	0.219	0.27	1.23288	0.51	0.513	1.00588	48.06	47.01	0.978152
JH16	75.8636	86.8217	1.14444	6.3186	5.4641	0.864764	6.98925	11.5054	1.64615	62.9091	108.727	1.72832	0.686	0.692	1.00875	0.804	0.812	1.00995	0.189	0.218	1.15344	0.531	0.561	1.0565	46.68	43.25	0.926521
HY39	57.3971	54.6444	0.952041	7.0687	5.8538	0.82813	8.8172	10.2151	1.15854	49.8182	43.2727	0.868613	0.588	0.644	1.09524	0.789	0.816	1.03422	0.737	0.19	0.257802	0.509	0.441	0.866405	40.5	45.43	1.12173
HY39	56.2376	55.3968	0.985049	7.3099	5.9492	0.813855	8.70968	10.1897	1.16993	51.2727	45.8182	0.893617	0.592	0.637	1.07601	0.78	0.809	1.03718	0.73	0.193	0.264384	0.535	0.429	0.801869	40.62	45.65	1.12383
HY39	57.45	55.5731	0.96733	7.1836	5.9801	0.832466	8.3871	9.35484	1.11538	51.6364	43.6364	0.84507	0.583	0.665	1.14065	0.774	0.804	1.03876	0.746	0.154	0.206434	0.477	0.47	0.985325	42.57	46.91	1.10195
YY45	69.9242	87.4939	1.25127	5.3366	6.3192	1.18412	10.5149	14.3011	1.36008	14.1818	137.818	9.71795	0.558	0.724	1.29749	0.802	0.82	1.02244	0.799	0.055	0.068836	0.663	0.566	0.853695	43.56	44.53	1.02227
YY45	66.9258	85.2043	1.27312	5.3366	6.3528	1.19042	9.32249	12.1505	1.30336	14.1818	134.909	9.51282	0.558	0.708	1.26882	0.802	0.826	1.02993	0.741	0.1	0.134953	0.443	0.546	1.23251	43.56	45.03	1.03375
YY45	66.9474	84.1463	1.2569	5.3702	6.4426	1.19969	8.56369	10.2151	1.19283	14.1818	132.727	9.35897	0.595	0.705	1.18487	0.8	0.816	1.02	0.759	0.074	0.0974967	0.467	0.526	1.12634	44.67	45.77	1.02463

## Sheet: Drainage for 7 days
	REL(%)			MDA(umol/g FW)			SOD(U/g FW)			CAT(U/g FW)			ΦPSⅡ			NPQt			Fv/Fm			qL			SPAD
Varieties	CK	WK		CK	WK		CK	WK		CK	WK		CK	WK		CK	WK		CK	WK		CK	WK		CK	WK
YYHS	90.9034	86.9274	0.956261	5.3208	7.9831	1.50036	5.60647	17.8701	3.18741	17.4545	47.6364	2.72917	0.55	0.648	1.17818	1.532	0.797	0.520235	0.658	0.718	1.09119	0.633	0.545	0.860979	36.51	41.12	1.12627
YYHS	90.6365	86.3799	0.953037	5.158	7.7137	1.49548	5.60647	16.2078	2.89091	17.0909	46.9091	2.74468	0.569	0.618	1.08612	1.334	0.797	0.597451	0.676	0.772	1.14201	0.632	0.596	0.943038	36.82	41.61	1.13009
YYHS	86.6783	85.8178	0.990073	5.6031	8.0953	1.44479	5.39084	15.4805	2.87164	17.4545	45.8182	2.625	0.549	0.594	1.08197	1.426	0.92	0.645161	0.668	0.731	1.09431	0.605	0.575	0.950413	35.82	41.12	1.14796
YY13	82.3329	90.8519	1.10347	5.0346	6.8078	1.3522	12.1818	16.9072	1.38791	21.4545	62.9091	2.9322	0.608	0.7	1.15132	0.677	0.717	1.05908	0.744	0.756	1.01613	0.534	0.752	1.40824	47.35	35.98	0.759873
YY13	79.4887	89.6973	1.12843	5.012	6.3951	1.27596	13.2658	17.4227	1.31335	21.4545	67.6364	3.15254	0.6	0.709	1.18167	0.61	0.573	0.939344	0.752	0.767	1.01995	0.496	0.74	1.49194	48.55	37.17	0.765602
YY13	76.2411	89.2607	1.17077	5.0232	6.7852	1.35077	12.2532	16.9072	1.37982	23.2727	72	3.09375	0.608	0.648	1.06579	0.489	0.48	0.981595	0.752	0.74	0.984043	0.497	0.647	1.30181	48.54	39	0.803461
HH2	65.0339	70.8333	1.08917	4.7005	10.5961	2.25425	8.73315	16.9091	1.9362	22.5455	78.1818	3.46774	0.678	0.724	1.06785	0.432	0.553	1.28009	0.773	0.759	0.981889	0.617	0.753	1.22042	49.08	45.33	0.923594
HH2	70.7714	71.1352	1.00514	4.7005	9.1149	1.93913	8.19407	13.5455	1.65308	21.4545	76.3636	3.55932	0.701	0.705	1.00571	0.295	0.477	1.61695	0.79	0.768	0.972152	0.623	0.759	1.2183	49.71	45.6	0.91732
HH2	63.841	70.1459	1.09876	4.7005	10.3576	2.20351	8.73315	14.0909	1.6135	17.8182	69.8182	3.91837	0.701	0.718	1.02425	0.295	0.4	1.35593	0.79	0.777	0.983544	0.623	0.772	1.23917	49.71	46.43	0.934017
KN1715	85.5694	82.319	0.962015	5.735	6.3192	1.10187	6.18557	8.27273	1.33742	82.1818	32	0.389381	0.675	0.618	0.915556	0.436	0.633	1.45183	0.773	0.749	0.968952	0.611	0.542	0.88707	46.16	40.85	0.884965
KN1715	88.8529	83.209	0.93648	5.735	6.3495	1.10715	7.31959	9.27835	1.26761	78.5455	32	0.407407	0.675	0.63	0.933333	0.436	0.453	1.03899	0.773	0.771	0.997413	0.611	0.507	0.829787	46.16	43.67	0.946057
KN1715	89.7543	85.6	0.953715	5.404	6.3192	1.16936	7.39241	9.17526	1.24117	76	29.4545	0.38756	0.701	0.672	0.958631	0.296	0.35	1.18243	0.79	0.783	0.991139	0.624	0.568	0.910256	47.02	43.67	0.928754
HY4	67.2273	85.0558	1.2652	6.7454	7.5409	1.11793	9.07216	13.4545	1.48306	22.3333	23.6667	1.0597	0.587	0.694	1.18228	1.035	0.36	0.347826	0.706	0.767	1.0864	0.593	0.631	1.06408	39.1	38.73	0.990537
HY4	69.5455	87.3273	1.25569	6.5741	6.8086	1.03567	12.5773	16.3636	1.30104	38.6667	38.6667	1	0.586	0.668	1.13993	1.072	0.36	0.335821	0.706	0.77	1.09065	0.602	0.654	1.08638	39.1	38.73	0.990537
HY4	70.8108	88.7678	1.25359	6.6527	6.8086	1.02343	12.1649	16.3636	1.34515	23.6667	22.3333	0.943662	0.587	0.659	1.12266	1.035	0.355	0.342995	0.702	0.747	1.0641	0.593	0.536	0.903879	38.54	38.73	1.00493
DBW	90.8791	56.4874	0.621567	8.389	6.1342	0.731219	4.72727	14.2338	3.01099	65.0909	107.636	1.65363	0.618	0.667	1.07929	0.501	0.386	0.770459	0.765	0.739	0.966013	0.498	0.709	1.42369	41.99	28.96	0.689688
DBW	85.707	49.8775	0.581953	8.389	6.1651	0.734903	4.35443	13.2987	3.05406	68.7273	133.818	1.94709	0.655	0.713	1.08855	0.344	0.278	0.80814	0.784	0.792	1.0102	0.522	0.65	1.24521	44.4	28.96	0.652252
DBW	87.5258	57.3255	0.654955	7.8052	5.921	0.758597	4.96203	15.4805	3.1198	72	137.818	1.91414	0.632	0.667	1.05538	0.496	0.386	0.778226	0.765	0.779	1.0183	0.526	0.681	1.29468	43.28	28.96	0.669131
YH65	65.008	73.3228	1.1279	6.4408	6.6027	1.02514	4.4557	11.9481	2.68152	10.5455	15.6364	1.48276	0.684	0.648	0.947368	0.385	0.44	1.14286	0.779	0.775	0.994865	0.613	0.568	0.926591	46.38	47.39	1.02178
YH65	68.2373	75.8495	1.11155	5.751	6.3221	1.0993	5.67089	12.7792	2.25348	10.9091	16	1.46667	0.663	0.662	0.998492	0.543	0.506	0.93186	0.76	0.764	1.00526	0.621	0.577	0.929147	46.35	46.9	1.01187
YH65	69.9561	77.9581	1.11439	6.4408	6.5297	1.0138	5.67089	13.7143	2.41837	10.5455	14.9091	1.41379	0.686	0.666	0.970845	0.398	0.421	1.05779	0.777	0.772	0.993565	0.626	0.581	0.928115	46.16	46.29	1.00282
YH22	88.785	80.0116	0.901183	5.1352	9.2584	1.80293	3.71955	4.19263	1.12719	39.6364	78.9091	1.99083	0.672	0.626	0.931548	0.395	0.491	1.24304	0.778	0.766	0.984576	0.586	0.511	0.872014	52.2	48.44	0.927969
YH22	94.7137	84.0298	0.887198	4.8293	8.7254	1.80676	4.98584	4.98584	1	39.2727	82.5455	2.10185	0.679	0.616	0.907216	0.4	0.543	1.3575	0.777	0.76	0.978121	0.607	0.508	0.836903	51.97	48.29	0.92919
YH22	92.1016	82.4471	0.895176	5.0512	9.1574	1.81292	4.98584	4.98584	1	39.6364	83.2727	2.10092	0.698	0.637	0.912607	0.401	0.452	1.12718	0.777	0.771	0.992278	0.665	0.522	0.784962	50.43	44.94	0.891136
JH7	82.6032	78.0271	0.944602	6.7149	8.3776	1.24761	13.7897	7.1134	0.515848	48	41.0909	0.856061	0.696	0.645	0.926724	0.285	0.45	1.57895	0.792	0.788	0.994949	0.604	0.539	0.892384	51.01	44.24	0.867281
JH7	80.1688	75.0479	0.936124	6.9449	9.1449	1.31678	12.0909	6.39175	0.528641	48.3636	43.2727	0.894737	0.652	0.645	0.989264	0.411	0.417	1.0146	0.776	0.775	0.998711	0.542	0.496	0.915129	48.29	44.03	0.911783
JH7	77.085	73.1329	0.948731	6.4343	7.8305	1.21699	12.4545	6.84597	0.549676	64.7273	52	0.803371	0.652	0.643	0.986196	0.411	0.314	0.76399	0.776	0.771	0.993557	0.542	0.486	0.896679	48.29	43.1	0.892524
HY10	84.4083	60.6202	0.718178	7.1888	7.1824	0.99911	6.00567	13.0928	2.18007	21.0909	88	4.17241	0.667	0.598	0.896552	0.353	0.711	2.01416	0.783	0.74	0.945083	0.556	0.522	0.938849	51.31	44.43	0.865913
HY10	88.5307	62.1212	0.701691	7.1523	7.0818	0.990143	6.34561	14.1299	2.22672	24	94.9091	3.95455	0.684	0.588	0.859649	0.247	0.782	3.16599	0.796	0.765	0.961055	0.552	0.52	0.942029	54.25	45.82	0.844608
HY10	85.9952	61.9335	0.720197	7.0289	6.93	0.98593	5.66572	12.4742	2.2017	24.7273	100.727	4.07353	0.662	0.65	0.981873	0.415	0.496	1.19518	0.775	0.733	0.945806	0.569	0.569	1	52.64	45.41	0.862652
FH1	91.6161	87.713	0.957397	6.2624	8.6507	1.38137	10.4304	19.3247	1.85273	31.6667	116.727	3.68612	0.692	0.607	0.877168	0.415	0.598	1.44096	0.775	0.753	0.971613	0.652	0.506	0.776074	39.01	44.64	1.14432
FH1	92.0321	87.713	0.953069	6.5766	8.9033	1.35378	10.4304	19.6907	1.88782	43.2727	153.091	3.53782	0.684	0.622	0.909357	0.394	0.585	1.48477	0.778	0.755	0.970437	0.618	0.535	0.865696	41.02	46.15	1.12506
FH1	89.3773	83.871	0.938392	6.4812	8.8892	1.37154	10.4304	19.8969	1.90759	35.6364	116.727	3.27551		0.612	#DIV/0!	0.505	0.673	1.33267	0.764	0.745	0.975131	0.551	0.54	0.980036	41.12	46.39	1.12816
SLLK	62.3611	82.1896	1.31796	7.4499	7.9808	1.07126	3.66577	13.7113	3.74037	43.2727	30.9091	0.714286	0.725	0.662	0.913103	0.169	0.593	3.50888	0.807	0.754	0.934325	0.63	0.64	1.01587	46.94	33.99	0.724116
SLLK	66.386	83.6049	1.25938	7.2676	7.3744	1.0147	3.66577	14.0206	3.82474	37.0909	27.6364	0.745098	0.725	0.65	0.896552	0.404	0.7	1.73267	0.777	0.742	0.954955	0.63	0.647	1.02698	46.89	32.32	0.689273
SLLK	65.5717	84.7053	1.2918	7.3238	7.9495	1.08543	4.55696	14.2268	3.12199	43.2727	30.9091	0.714286	0.686	0.671	0.978134	0.404	0.59	1.4604	0.807	0.754	0.934325	0.628	0.664	1.05732	46.94	32.79	0.698551
JH16	87.2744	85.5773	0.980555	7.5899	6.7593	0.890565	5.08557	16.6234	3.26873	24	77.4545	3.22727	0.662	0.667	1.00755	0.429	0.4	0.932401	0.773	0.777	1.00517	0.574	0.575	1.00174	43.49	43.48	0.99977
JH16	89.2336	86.5801	0.970264	7.3039	6.4928	0.88895	5.77017	17.2468	2.98895	20.3636	69.8182	3.42857	0.619	0.661	1.06785	0.403	0.43	1.067	0.805	0.783	0.972671	0.393	0.571	1.45293	45.38	43.48	0.958131
JH16	86.0909	85.359	0.991498	7.5453	6.6367	0.879581	6.16137	18.4935	3.00153	20.3636	56.3636	2.76786	0.668	0.668	1	0.403	0.352	0.873449	0.777	0.773	0.994852	0.578	0.558	0.965398	45.63	44.71	0.979838
HY39	72.6475	70.7295	0.973598	6.9331	7.3296	1.05719	16.9351	12.6161	0.744971	21.4545	76	3.54237	0.687	0.616	0.896652	0.436	0.466	1.06881	0.716	0.761	1.06285	0.646	0.483	0.747678	50.41	49.15	0.975005
HY39	78.8712	75.6732	0.959453	6.4872	7.1753	1.10607	16.9351	13.1051	0.773846	23.2727	77.4545	3.32812	0.599	0.671	1.1202	0.984	0.466	0.473577	0.764	0.769	1.00654	0.607	0.521	0.85832	48.62	48.43	0.996092
HY39	78.7864	75.5223	0.958569	6.7004	7.2062	1.07549	16.8312	12.6161	0.74957	24.7273	77.4545	3.13235	0.599	0.61	1.01836	0.984	0.531	0.539634	0.75	0.797	1.06267	0.607	0.49	0.807249	49.97	48.82	0.976986
YY45	69.1837	78.2306	1.13077	7.6745	6.3833	0.831755	9.58435	11.6442	1.21492	17.4545	66.9091	3.83333	0.589	0.602	1.02207	0.771	0.487	0.631647	0.734	0.759	1.03406	0.519	0.544	1.04817	42.31	48.63	1.14937
YY45	73.6551	81.7601	1.11004	7.4839	6.1645	0.823702	9.77995	11.9677	1.22369	20.3636	67.2727	3.30357	0.577	0.623	1.07972	0.936	0.755	0.806624	0.716	0.759	1.06006	0.541	0.504	0.931608	39.31	47.11	1.19842
YY45	75.4491	78.7763	1.0441	7.5005	6.3159	0.842064	10.4645	13.0073	1.24299	20.3636	70.5455	3.46429	0.73	0.597	0.817808	0.771	0.617	0.800259	0.788	0.799	1.01396	0.725	0.491	0.677241	43.25	49.44	1.14312

## Sheet: Yield and yield components
	HPW(g)			HKW(g)			Y(g)			TP(per plant)
Varieties	CK	WK		CK	WK		CK	WK		CK	WK
YYHS	171.3	146.1	0.85289	63.9	53.4	0.835681	18.6	14.6	0.784946	16	14	0.875
YYHS	166.2	144	0.866426	62.1	54.7	0.880837	18.28	15.36	0.840263	15	14	0.933333
YYHS	171.9	147	0.855148	65.2	51.5	0.789877	18.6	15.97	0.858602	21	17	0.809524
YY13	176.3	166	0.941577	59.4	53	0.892256	25.09	19.6	0.781188	19	19	1
YY13	180.1	168	0.932815	60.3	54	0.895522	22.26	19.3	0.867026	20	20	1
YY13	178.3	168	0.942232	59.4	52	0.875421	25.09	20.5	0.817059	20	21	1.05
HH2	182	140.3	0.770879	64	52.5	0.820312	24.9	15.52	0.623293	28	16	0.571429
HH2	188	144.9	0.770745	63	51.8	0.822222	20.9	15	0.717703	30	17	0.566667
HH2	186	143.4	0.770968	61	50.6	0.829508	19.7	13.59	0.689848	26	16	0.615385
KN1715	172.5	100.2	0.58087	60.8	42	0.690789	24.31	10.47	0.430687	30	10	0.333333
KN1715	173.1	101.1	0.584055	58.1	43.2	0.743546	20.21	6.47	0.320139	25	9	0.36
KN1715	179.2	109	0.608259	61.1	40.9	0.669394	28.51	11.34	0.397755	26	10	0.384615
HY4	170	131.5	0.773529	62.5	45.1	0.7216	20.5	7.82	0.381463	20	9	0.45
HY4	167.4	132.7	0.792712	63.5	47	0.740157	26.15	8.98	0.343403	21	9	0.428571
HY4	170.2	133.4	0.783784	62	46.2	0.745161	25.16	8.36	0.332273	25	11	0.44
DBW	195.8	167	0.852911	50.8	40.8	0.80315	15.26	11.32	0.741809	26	11	0.423077
DBW	195.7	164.4	0.840061	52.5	41.8	0.79619	13.33	11.12	0.834209	27	16	0.592593
DBW	193.3	160.6	0.830833	51.5	41.3	0.801942	15.2	11.12	0.731579	25	11	0.44
YH65	170	113.8	0.669412	50	40.6	0.812	18.9	7.67	0.40582	18	12	0.666667
YH65	180	114.4	0.635556	52	41	0.788462	18.3	7.67	0.419126	17	11	0.647059
YH65	180	117	0.65	53	42	0.792453	21.3	8.68	0.407512	19	13	0.684211
YH22	166.2	157.7	0.948857	71.2	61.8	0.867978	16.22	16.52	1.0185	20	14	0.7
YH22	162	155	0.95679	68.9	60.8	0.882438	15.24	16.33	1.07152	17	12	0.705882
YH22	165.5	156.1	0.943202	70.6	61.2	0.866856	14.54	14.04	0.965612	16	10	0.625
JH7	182.7	100	0.547345	69	33	0.478261	18.36	8	0.43573	17	15	0.882353
JH7	177.1	98	0.55336	71.1	34	0.4782	21.01	8.3	0.39505	16	13	0.8125
JH7	185.6	104	0.560345	70.2	36	0.512821	15.13	7.7	0.508923	16	12	0.75
HY10	182.4	110	0.60307	74	39	0.527027	17.03	13.1	0.769231	22	13	0.590909
HY10	182.7	118	0.645868	71.4	40	0.560224	18.08	13.3	0.735619	23	14	0.608696
HY10	175.7	106	0.603301	70.9	37	0.521862	14.7	9.3	0.632653	27	17	0.62963
FH1	186.8	182	0.974304	69.1	55	0.795948	24.94	17	0.681636	23	14	0.608696
FH1	182.4	180	0.986842	67.5	54	0.8	27.5	17.6	0.64	21	14	0.666667
FH1	190	184	0.968421	70.4	56	0.795455	24.74	18.7	0.755861	21	11	0.52381
SLLK	98	96.7	0.986735	34	39.4	1.15882	15.6	11.63	0.745513	34	15	0.441176
SLLK	100	98.3	0.983	36	40	1.11111	15.5	11.38	0.734194	28	11	0.392857
SLLK	96	94.5	0.984375	37	40.5	1.09459	11.3	7.45	0.659292	27	10	0.37037
JH16	192.1	134.4	0.699636	74.8	57.3	0.766043	20.89	8.76	0.419339	19	14	0.736842
JH16	198.1	136.8	0.69056	79.3	59	0.74401	22.64	9.62	0.424912	20	16	0.8
JH16	199.9	139.7	0.698849	78.3	58.8	0.750958	26.57	12.29	0.462552	18	14	0.777778
HY39	134	102.9	0.76791	53.6	47.6	0.88806	15.07	8.08	0.536165	24	10	0.416667
HY39	138.3	106.3	0.768619	58.2	48.7	0.83677	16.29	9.09	0.558011	24	9	0.375
HY39	137.8	104.2	0.756168	56	47.7	0.851786	17.88	9.3	0.520134	21	8	0.380952
YY45	231.5	133.8	0.57797	87	44.4	0.510345	27.54	21.92	0.795933	19	20	1.05263
YY45	228.5	132.8	0.581182	86.7	45	0.519031	25.77	21.92	0.850601	17	18	1.05882
YY45	224.4	131.6	0.586453	82.8	43.8	0.528986	23.87	21.03	0.881022	19	20	1.05263
